# Supplementary material for: Revision of the World Meteorological Organization Global Atmosphere Watch (WMO/GAW) CO 2 calibration scale
Source: Copernicus journal article supplement (doi:10.5194/amt-14-3015-2021), 2021-04-26
Supplement: Supplementary file [file amt-14-3015-2021-supplement-title-page.pdf › amt-14-3015-2021-supplement-title-page.pdf]

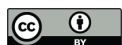

## *Supplement of*

# **Revision of the World Meteorological Organization Global Atmosphere Watch (WMO/GAW) CO<sub>2</sub> calibration scale**

**Bradley D. Hall et al.**

*Correspondence to:* Bradley D. Hall ([bradley.hall@noaa.gov](mailto:bradley.hall@noaa.gov))

- amt-14-3015-2021-supplement-title-page.pdf
- CO2\_X2019\_primary\_data\_supplement.xls
- X2019\_Supplemental\_Material\_text.pdf
- \_\_MACOSX
  - .\_CO2\_X2019\_primary\_data\_supplement.xls
  - .\_X2019\_Supplemental\_Material\_text.pdf

The copyright of individual parts of the supplement might differ from the article licence.
